# Supplementary material for: Protective mechanisms of purified polyphenols from pinecones of Pinus koraiensis on spleen tissues in tumor-bearing S180 mice in vivo
Source: Royal Society of Chemistry journal article supplement (doi:10.1039/c6fo01235c), 2016-11-15
Supplement: c6fo01235c1.pdf [file c6fo01235c1.pdf]

Fig. 1S. HPLC chromatograms of standard (A) and PPP-40 (B) recorded at 280 nm (peak 1: catechinic acid, peak 2: procyanidin B<sub>2</sub>, peak 3: epicatechin, peak 4: taxifolin)

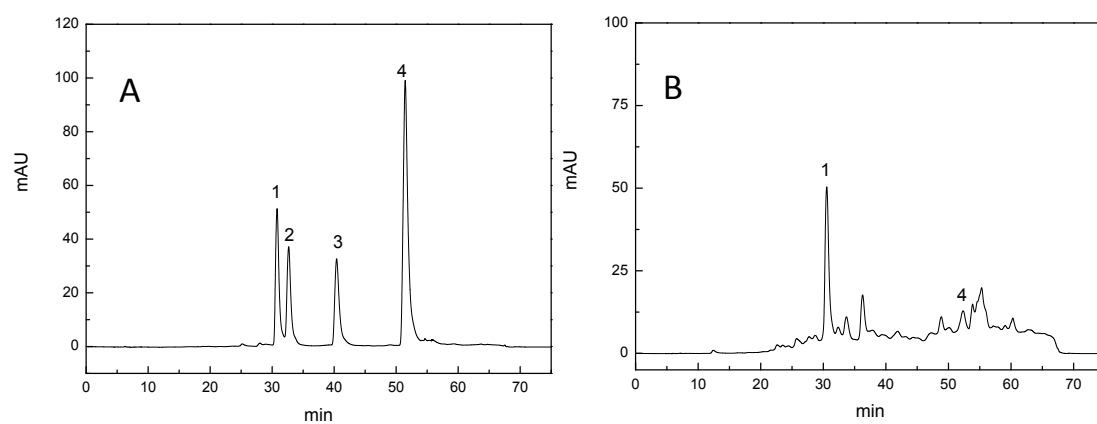

Fig. 2S. Effect of PPP-40 on weight of S180 mice

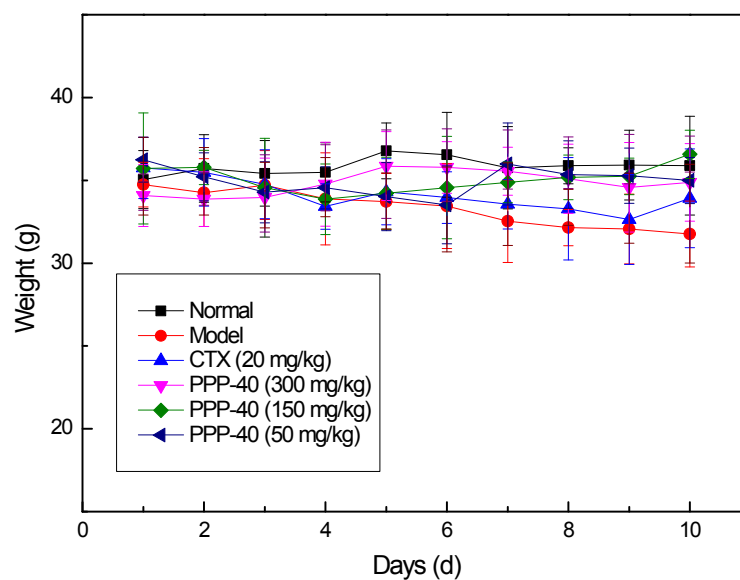

Fig. 3S.

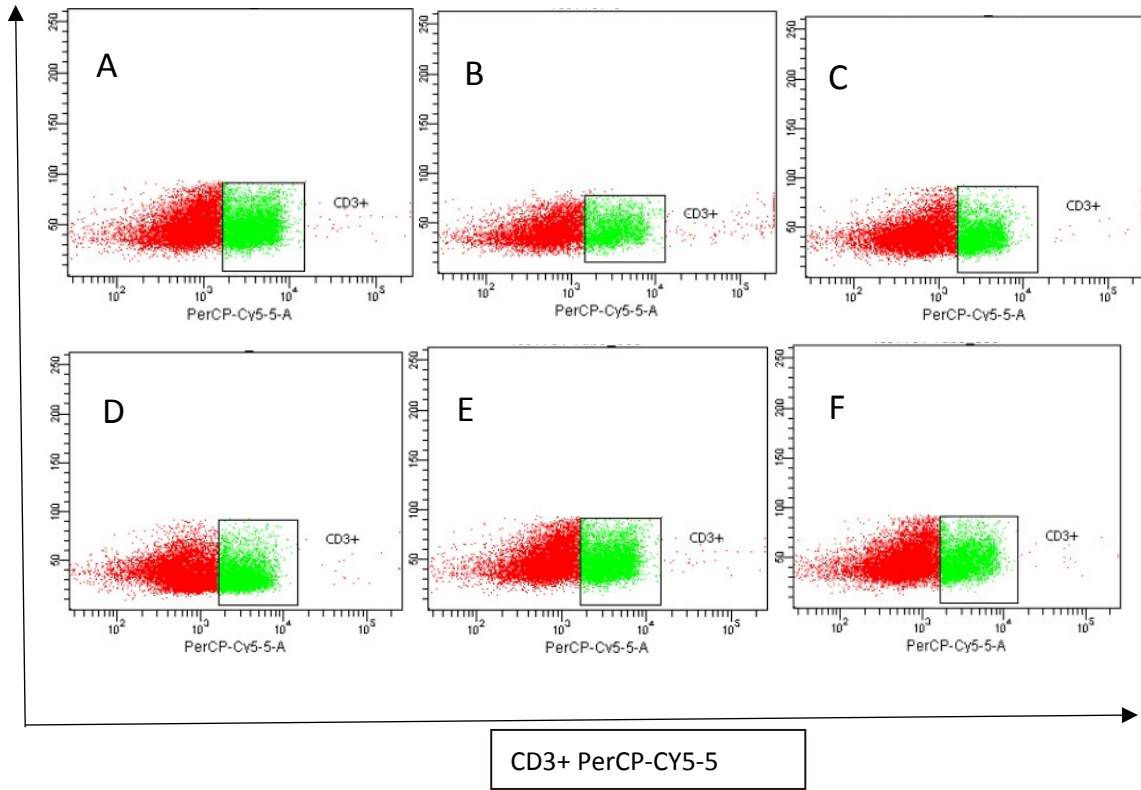

Table 1S

Table 1S. The effect of PPP-40 on the organ index of tumor-bearing S180 mice

| Group <sup>a</sup> | Heart index | Liver index | Spleen index | Kidney index |
|--------------------|-------------|-------------|--------------|--------------|
| Normal             | 0.24±0.09   | 1.97±0.08   | 0.21±0.09    | 0.66±0.07    |
| Model              | 0.13±0.09** | 1.21±0.21** | 0.15±0.03**  | 0.47±0.02*   |
| CTX                | 0.18±0.08*# | 1.56±0.31*# | 0.13±0.13**  | 0.59±0.21#   |
| PPP-40-L           | 0.14±0.16** | 1.34±0.08** | 0.14±0.08**  | 0.52±0.02*   |
| PPP-40-M           | 0.21±0.09## | 1.57±0.36*# | 0.16±0.07**  | 0.58±0.17#   |
| PPP-40-H           | 0.19±0.12## | 1.58±0.38*# | 0.17±0.12*#  | 0.56±0.22    |

Notes: \*\* $p < 0.01$ , \* $p < 0.05$  vs Normal group; ##  $p < 0.01$ , # $p < 0.05$  vs Model group.
